# Supplementary material
Source: PubMed Central journal article supplement (PMC9857708)
Supplement: jamadermatol-e225978-s002.pdf [file jamadermatol-e225978-s002.pdf]

## Data Sharing Statement

Ji-Xu. Assessing the Discriminatory Ability of Diagnostic Criteria for Ulcerative Pyoderma Gangrenosum and Its Mimickers. *JAMA Dermatol*. Published January 18, 2023.  
doi:10.1001/jamadermatol.2022.5978

### Data

**Data available:** No
